# Supplementary material for: A three component fully interlocked 3-D network: crystal structure and magnetic properties
Source: Royal Society of Chemistry journal article supplement (doi:10.1039/b102072m), 2001-01-01
Supplement: b102072mm.doc [file b102072mm.doc]

#### Supporting Information for magnetic results

Figure S1 shows the orbitals interaction diagram between the symmetric (S) and the antisymmetric (AS) combinations of the piperazine nitrogen atoms lone pairs on one hand with the two symmetry adapted (S and AS) orbitals of the  carbon skeleton. These interactions lead to a lift of the degeneracy of the nitrogen lone pair orbitals. The interaction between the two new orbitals with the two degenerate (S and AS) combinations of the dx2-y2-type CuII orbitals leads to the formation of two molecular orbitals with different energies. This is what R. Hoffmann called through-bond interaction.

Figure S1

On the other hand, in the case where the fumarate is bridging, the interaction between the  orbitals of the four cabon atoms leads to four -type orbitals that possess the same symmetry of the S and the AS combinations of the oxygen lone pairs atoms (Figure S2). The interaction between the oxygen lone pairs' orbitals and the  skeleton orbitals does not in this case lift (we assume that the overlap integral between the orbitals of the central two carbon atoms is negligible in comparison to the overlap between one external and one central carbon) the degeneracy of the former orbitals. Consquently, the interaction between the metallic orbitals and the two degenerate oxygen lone pairs orbitals does not lift the degeneracy of the metallic molecular orbitals. In this case, through-bond interaction does not operate between the metallic orbitals.

Figure S2

Since, the magnitude of the antiferromagnetic interaction is related to the energy difference between the molecular orbitals constructed from the the pure metallic and the bridging ligands orbitals, we expect a relatively large antiferromagnetic interaction for a piperazine bridge and almost no interaction for fumarate.

Figure S3 shows the plot of MT as a function of temperature

Figure S3
